# Supplementary material
Source: Springer Nature journal article supplement (https://www.springerprofessional.de/resource/supplementary/13673_2012_41_MOESM4_ESM.pdf/11899370)

# User Vs Total Time Taken for Registration and Authentication

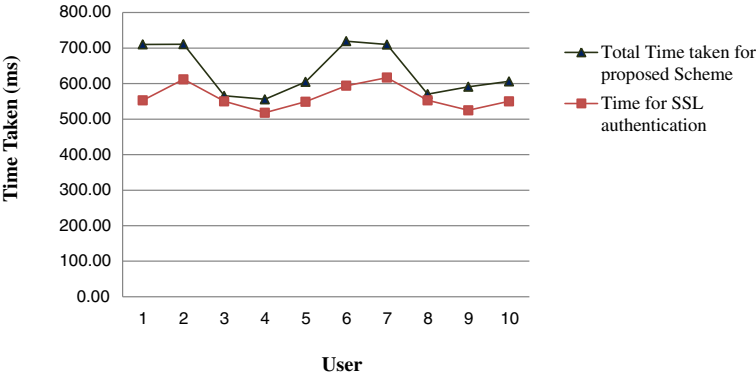

Supplement: MOESM4 [file 11899370]
